# Supplementary material for: Insights into the intracellular localization, protein associations and artemisinin resistance properties of Plasmodium falciparum K13
Source: PubMed Central journal article supplement (PMC7192513; doi:10.1371/journal.ppat.1008482), 2020-04-20

# Figure S1

**A**

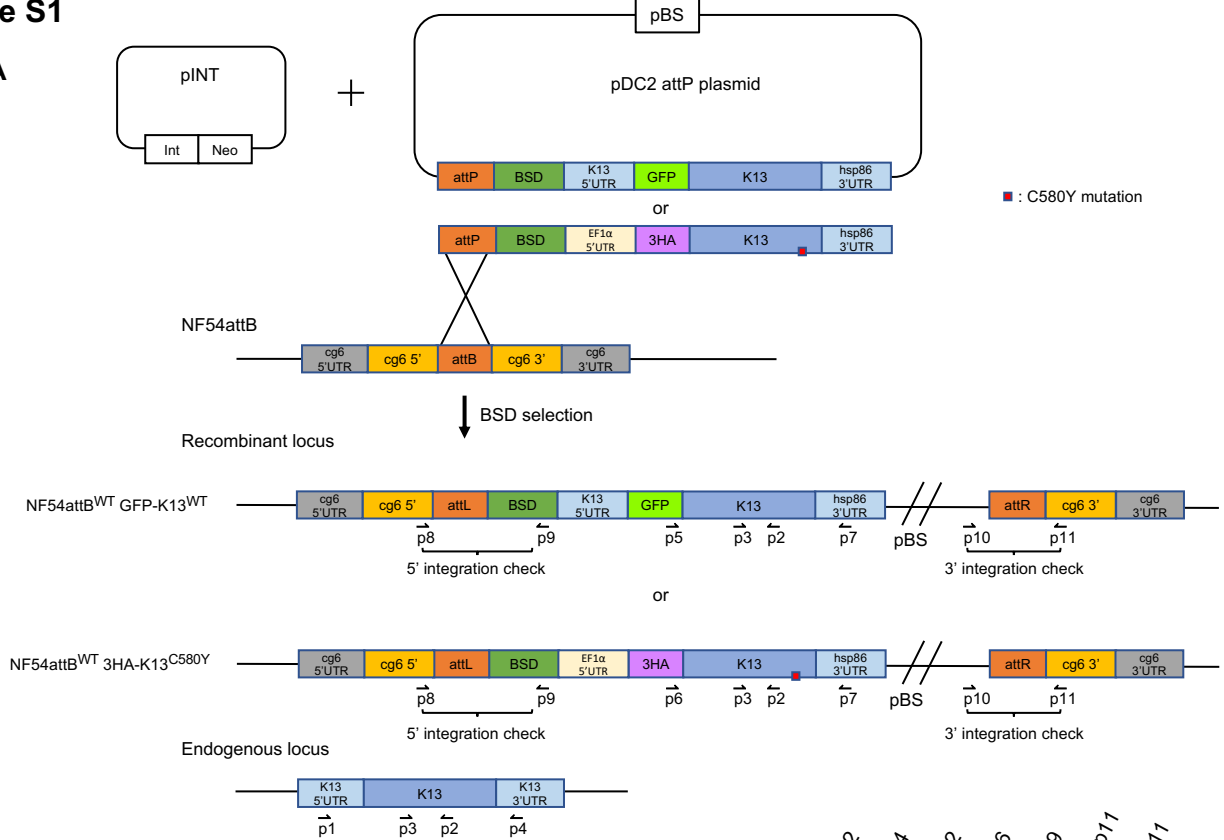

**B**

| locus               | primer pair | size   |
|---------------------|-------------|--------|
| endogenous 5'       | p1 + p2     | 2.6 kb |
| endogenous 3'       | p3 + p4     | 2.0 kb |
| GFP recombinant 5'  | p5 + p2     | 1.2 kb |
| 3HA recombinant 5'  | p6 + p2     | 1.5 kb |
| recombinant 3'      | p3 + p7     | 1.2 kb |
| attB integration 5' | p8 + p9     | 1.7 kb |
| attB integration 3' | p10 + p11   | 532 bp |
| NF54attB cg6 locus  | p8 + p11    | 200 bp |

**C**

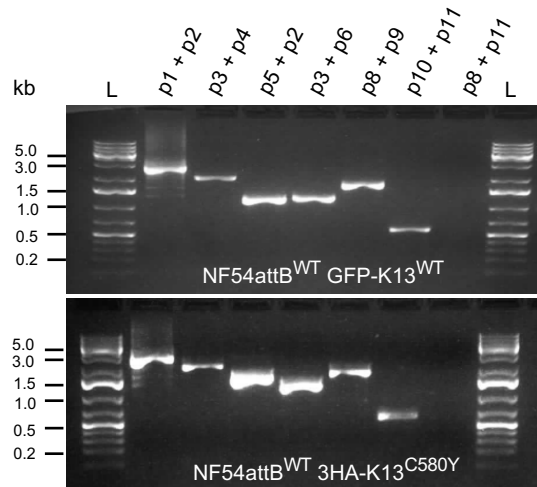

**D**

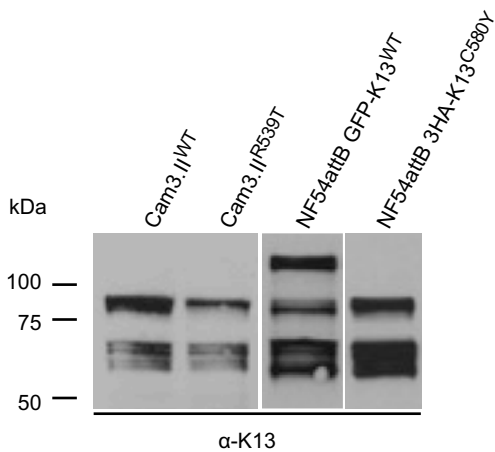

**E**

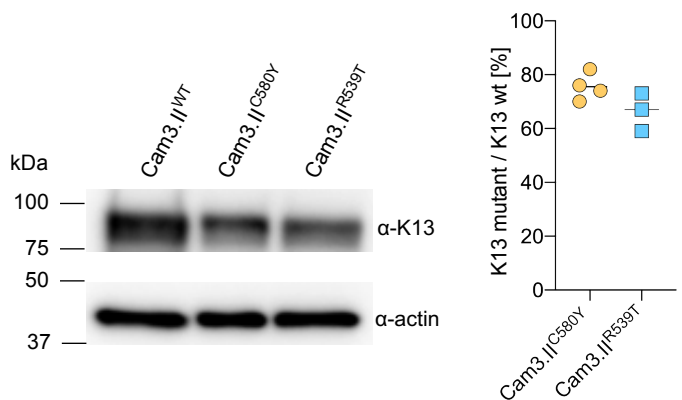

Supplement: ppat.1008482.s001.pdf [file ppat.1008482.s001.pdf]
