# Supplementary material for: Insights into the intracellular localization, protein associations and artemisinin resistance properties of Plasmodium falciparum K13
Source: PubMed Central journal article supplement (PMC7192513; doi:10.1371/journal.ppat.1008482), 2020-04-20

Figure S3

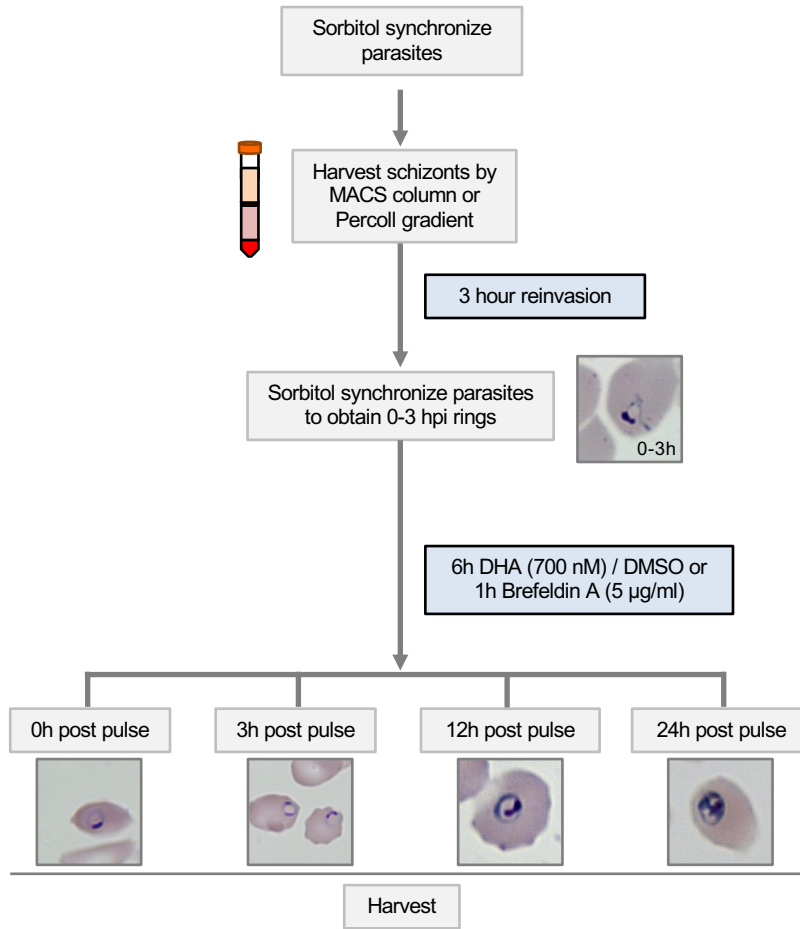

Supplement: ppat.1008482.s003.pdf [file ppat.1008482.s003.pdf]
