# Supplementary material for: Insights into the intracellular localization, protein associations and artemisinin resistance properties of Plasmodium falciparum K13
Source: PubMed Central journal article supplement (PMC7192513; doi:10.1371/journal.ppat.1008482), 2020-04-20
Supplement: ppat.1008482.s004.pdf [file ppat.1008482.s004.pdf]

# Figure S4

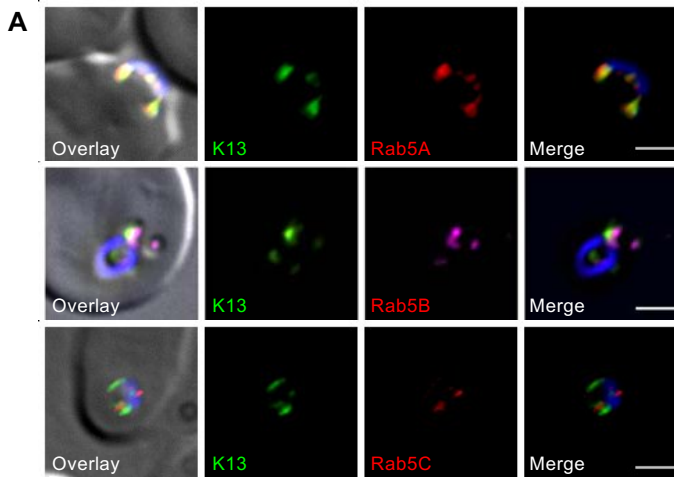

Cam3.II<sup>WT</sup> – 0h post pulse – DMSO mock treated

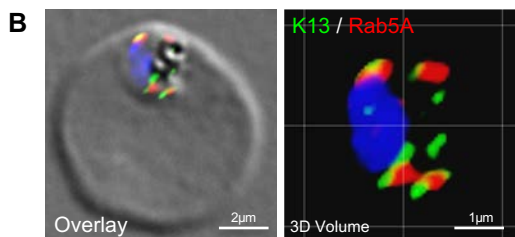

Cam3.II<sup>WT</sup> – 12h post pulse – DMSO mock treated

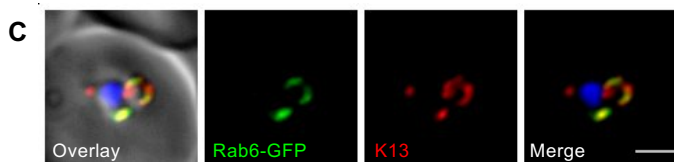

Dd2<sup>WT</sup> Rab6-GFP - 0h post pulse – DMSO mock treated

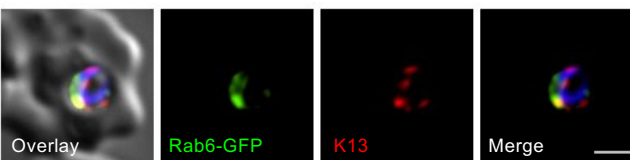

Dd2<sup>R539T</sup> Rab6-GFP - 0h post pulse – DMSO mock treated

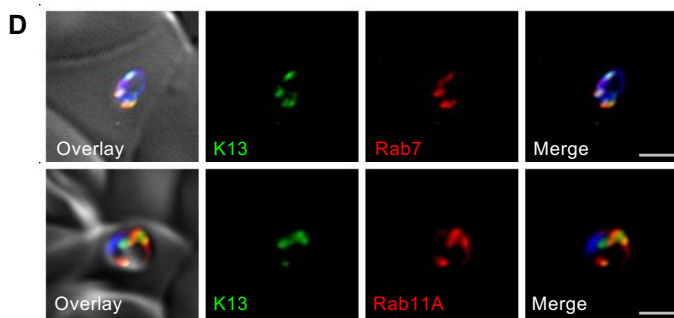

Cam3.II<sup>WT</sup> – 0h post pulse – DMSO mock treated

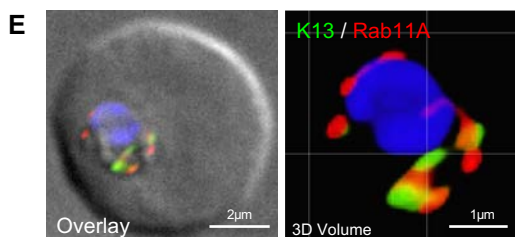

Cam3.II<sup>WT</sup> – 12h post pulse – DMSO mock treated

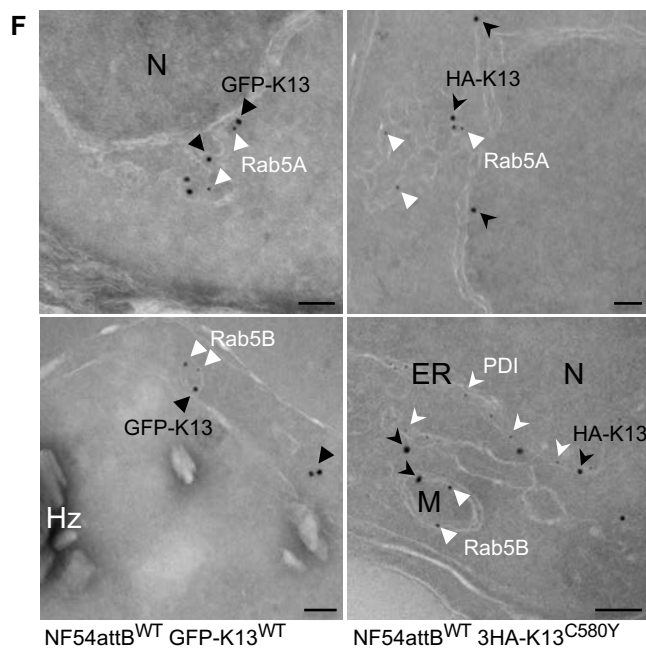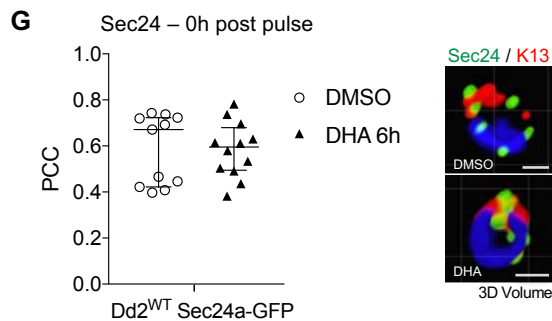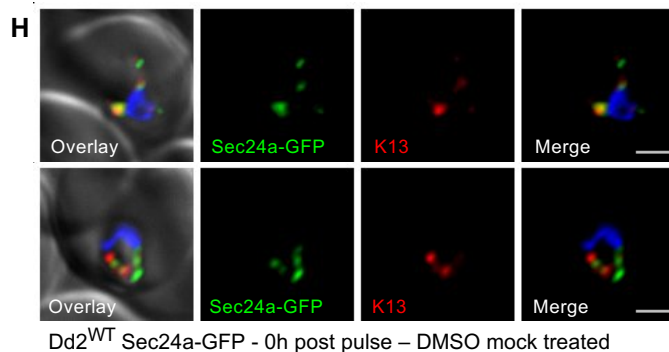

Dd2<sup>WT</sup> Sec24a-GFP - 0h post pulse – DMSO mock treated
