# Supplementary material for: Insights into the intracellular localization, protein associations and artemisinin resistance properties of Plasmodium falciparum K13
Source: PubMed Central journal article supplement (PMC7192513; doi:10.1371/journal.ppat.1008482), 2020-04-20

# Figure S5

**A**

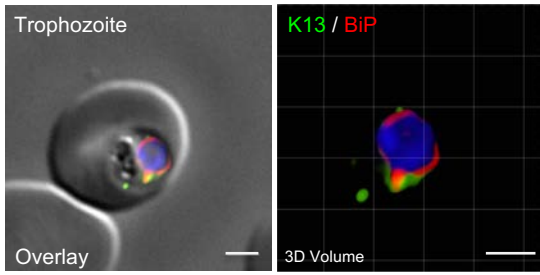

Cam3.11<sup>WT</sup>

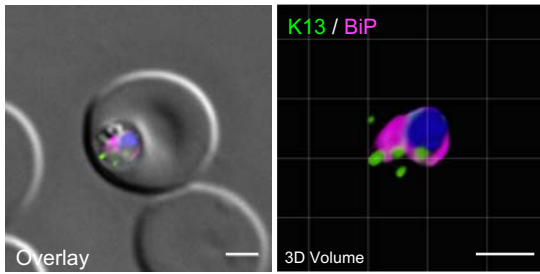

Cam3.11<sup>R539T</sup>

**B**

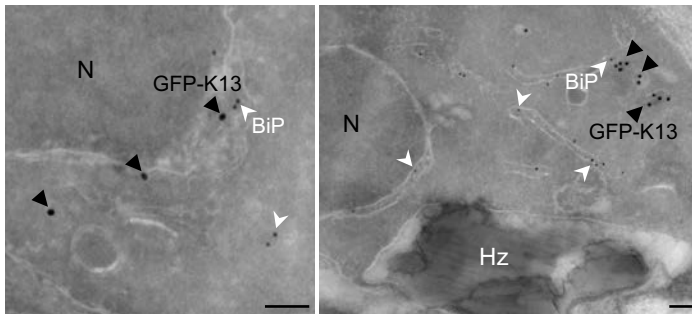

NF54attB<sup>WT</sup> GFP-K13<sup>WT</sup>

**C**

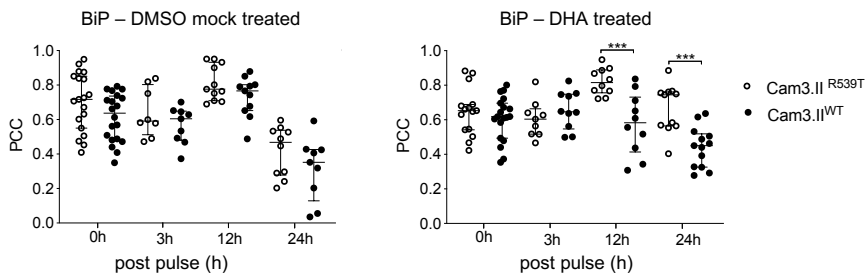

**D**

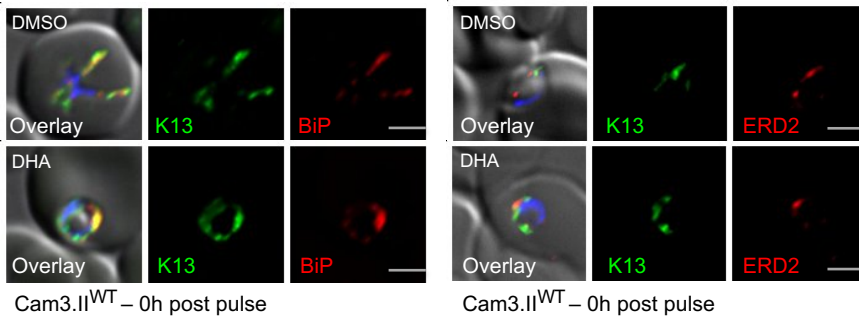

Supplement: ppat.1008482.s005.pdf [file ppat.1008482.s005.pdf]
