# Supplementary material for: Insights into the intracellular localization, protein associations and artemisinin resistance properties of Plasmodium falciparum K13
Source: PubMed Central journal article supplement (PMC7192513; doi:10.1371/journal.ppat.1008482), 2020-04-20
Supplement: ppat.1008482.s008.pdf [file ppat.1008482.s008.pdf]

**S1 Table. Co-immunoprecipitation experimental details.**

| <b>Experiment Number</b> | <b>Parasite lines included</b>                                              | <b>K13 mAbs used</b> | <b>Negative controls included</b>       |
|--------------------------|-----------------------------------------------------------------------------|----------------------|-----------------------------------------|
| 1                        | Cam3.II <sup>WT</sup> , Cam3.II <sup>C580Y</sup> , Cam3.II <sup>R539T</sup> | E3, D9               | --                                      |
| 2                        | CamWT                                                                       | E3, D9               | --                                      |
| 3                        | Cam3.II <sup>WT</sup> , Cam3.II <sup>C580Y</sup> , Cam3.II <sup>R539T</sup> | E3, D9               | Control resin, Control IgG <sup>1</sup> |
| 4                        | CamWT, CamWT <sup>C580Y</sup>                                               | E3, D9               | Control resin                           |
| 5                        | Cam3.II <sup>WT</sup> , Cam3.II <sup>R539T</sup>                            | E3, D9               | Control resin                           |
| 6                        | Cam3.II <sup>WT</sup> , Cam3.II <sup>R539T</sup>                            | E3, D9               | Control resin                           |

<sup>1</sup>Control resin refers to Pierce<sup>TM</sup> Control Agarose Resin (Pierce<sup>TM</sup> Direct IP Kit) only with no antibody coupled to IP column. Control IgG refers to AminoLink Plus Coupling Resin (Pierce<sup>TM</sup> Direct IP Kit) with an irrelevant mouse-specific IgG coupled to the IP column.
