# Supplementary material for: Insights into the intracellular localization, protein associations and artemisinin resistance properties of Plasmodium falciparum K13
Source: PubMed Central journal article supplement (PMC7192513; doi:10.1371/journal.ppat.1008482), 2020-04-20
Supplement: ppat.1008482.s009.pdf [file ppat.1008482.s009.pdf]

S2 Table. Putative K13-interacting protein partners identified by co-immunoprecipitation and LC/MS-MS (relaxed criteria). Page 1 of 2.

| PlasmoDB Gene ID | Gene Name                                                                                   | Abbreviation | Cellular component and/or functional features                                                | Mean fold change | Number of experiments present (of 6) <sup>1</sup> | Number of samples present (of 13 total, 6 WT, 7 mutant) <sup>2</sup> |
|------------------|---------------------------------------------------------------------------------------------|--------------|----------------------------------------------------------------------------------------------|------------------|---------------------------------------------------|----------------------------------------------------------------------|
| PF3D7_0708400    | Heat shock protein 90                                                                       | HSP90        | Oxidative protein folding in the ER, component of chaperone complexes that interact with BiP | 298              | 5                                                 | 11 (5,6)                                                             |
| PF3D7_1312600    | 2-oxoisovalerate dehydrogenase subunit alpha, mitochondrial, putative                       | BCKDHA       | Mitochondrial TCA cycle                                                                      | 270              | 5                                                 | 8 (3,5)                                                              |
| PF3D7_1408000    | Plasmeprin II                                                                               | PMII         | Digestive vacuole hemoglobinase                                                              | 264              | 5                                                 | 11 (5,6)                                                             |
| PF3D7_1324900    | L-lactate dehydrogenase                                                                     | LDH          | Glycolysis                                                                                   | 173              | 4                                                 | 9 (4,5)                                                              |
| PF3D7_0933600    | Mitochondrial-processing peptidase subunit beta, putative                                   | MAS1         | Mitochondrial protein degradation                                                            | 166              | 5                                                 | 8 (4,4)                                                              |
| PF3D7_1020900    | ADP-ribosylation factor                                                                     | ARF1         | Intracellular traffic, Clathrin, COPI                                                        | 106              | 5                                                 | 9 (3,6)                                                              |
| PF3D7_0523100    | Mitochondrial-processing peptidase subunit alpha, putative                                  | MAS2         | Mitochondrial protein degradation                                                            | 92               | 5                                                 | 8 (4,4)                                                              |
| PF3D7_0207600    | Serine repeat antigen 5                                                                     | SERA5        | Parasitophorous vacuole, parasite egress                                                     | 87               | 5                                                 | 9 (5,4)                                                              |
| PF3D7_0935900    | Ring-exported protein 1                                                                     | REX1         | Maurer's cleft exported protein                                                              | 81               | 4                                                 | 6 (2,4)                                                              |
| PF3D7_1446200    | M17 leucyl aminopeptidase                                                                   | LAP          | Hemoglobin digestion                                                                         | 76               | 6                                                 | 10 (5,5)                                                             |
| PF3D7_1345700    | Isocitrate dehydrogenase [NADP], mitochondrial                                              | IDH          | Mitochondrial antioxidant system / TCA cycle                                                 | 74               | 6                                                 | 13 (6,7)                                                             |
| PF3D7_0904800    | Replication protein A1, small fragment                                                      | RPA1         | DNA replication / repair                                                                     | 70               | 3                                                 | 7 (2,5)                                                              |
| PF3D7_1034400    | Flavoprotein subunit of succinate dehydrogenase                                             | SDHA         | Mitochondrial respiratory chain complex II (ETC)                                             | 60               | 5                                                 | 10 (5,5)                                                             |
| PF3D7_0303700    | Lipoamide acyltransferase component of branched-chain alpha-keto acid dehydrogenase complex | BCKDH-E2     | Mitochondrial antioxidant system                                                             | 59               | 3                                                 | 5 (3,2)                                                              |
| PF3D7_0617200    | Conserved <i>Plasmodium</i> protein, unknown function                                       | --           | Brf1p family coiled coil protein homolog, putative                                           | 59               | 3                                                 | 8 (3,5)                                                              |
| PF3D7_0513800    | Ras-related protein Rab1A                                                                   | RAB1A        | ER-Golgi translocation and quality control                                                   | 53               | 3                                                 | 6 (2,4)                                                              |
| PF3D7_0919000    | Nucleosome assembly protein                                                                 | NAP1         | Histone exchange during transcription elongation                                             | 50               | 4                                                 | 7 (2,5)                                                              |
| PF3D7_0629200    | DnaJ protein, putative                                                                      | --           | Oxidative protein folding in the ER, component of chaperone complexes that interact with BiP | 47               | 6                                                 | 13 (6,7)                                                             |
| PF3D7_0217100    | ATP synthase F1, alpha subunit                                                              | --           | Mitochondrion, proton-transporting ATP synthase complex, Ca2+ homeostasis                    | 44               | 4                                                 | 7 (3,4)                                                              |
| PF3D7_0619400    | Cell division cycle protein 48 homologue, putative                                          | p97          | ER-associated protein degradation (ERAD)                                                     | 41               | 6                                                 | 11 (5,6)                                                             |
| PF3D7_1239600    | Hydroxyethylthiazole kinase                                                                 | ThzK         | Thiamine (Vitamin B) metabolism / glucose metabolism                                         | 40               | 4                                                 | 9 (4,5)                                                              |
| PF3D7_1246200    | Actin I                                                                                     | ACT1         | Actin filaments                                                                              | 38               | 6                                                 | 13 (6,7)                                                             |
| PF3D7_1022400    | Serine/arginine-rich splicing factor 4                                                      | SR4          | Regulation of mRNA splicing, RNA steady state levels                                         | 36               | 2                                                 | 5 (2,3)                                                              |
| PF3D7_1302800    | 40S ribosomal protein S7, putative                                                          | --           | Ribosome                                                                                     | 36               | 5                                                 | 9 (4,5)                                                              |
| PF3D7_0103900    | Parasite-infected erythrocyte surface protein                                               | ERGIC-53     | Intracellular traffic                                                                        | 36               | 3                                                 | 6 (3,3)                                                              |
| PF3D7_1118200    | Heat shock protein 90, putative                                                             | HSP90        | Mitochondrial inner membrane                                                                 | 36               | 6                                                 | 12 (5,7)                                                             |
| PF3D7_1218500    | Dynamin-like protein, putative                                                              | --           | Mitochondrial division                                                                       | 33               | 5                                                 | 9 (4,5)                                                              |
| PF3D7_1340700    | Ras-related protein Rab11B                                                                  | RAB11B       | Intracellular traffic / Exocytosis                                                           | 33               | 4                                                 | 9 (4,5)                                                              |
| PF3D7_0817500    | histidine triad nucleotide-binding protein 1                                                | --           | Ca2+ homeostasis                                                                             | 32               | 4                                                 | 7 (4,3)                                                              |
| PF3D7_1108500    | Succinyl-CoA synthetase alpha subunit, putative                                             | --           | Mitochondrial antioxidant system / TCA cycle                                                 | 31               | 6                                                 | 11 (5,6)                                                             |
| PF3D7_0935800    | Cytoadherence linked asexual protein 9                                                      | CLAG9        | Invasion molecule                                                                            | 30               | 5                                                 | 8 (3,5)                                                              |
| PF3D7_0811600    | Conserved <i>Plasmodium</i> protein, unknown function                                       | --           | No known or predicted function                                                               | 28               | 5                                                 | 7 (4,3)                                                              |
| PF3D7_0302500    | Cytoadherence linked asexual protein 3.1                                                    | CLAG3.1      | Invasion molecule                                                                            | 27               | 4                                                 | 6 (4,2)                                                              |
| PF3D7_1407100    | rRNA 2'-O-methyltransferase fibrillar, putative                                             | NOP1         | Nucleolus, small nucleolar ribonucleoprotein complex                                         | 27               | 4                                                 | 8 (3,5)                                                              |
| PF3D7_1144900    | Ras-related protein Rab6                                                                    | RAB6         | Intracellular traffic / trans-Golgi network                                                  | 27               | 4                                                 | 8 (3,5)                                                              |
| PF3D7_1230400    | ATP-dependent protease subunit ClpQ                                                         | ClpQ         | Mitochondrial protease complex, protein export                                               | 27               | 6                                                 | 12 (6,6)                                                             |
| PF3D7_0306400    | FAD-dependent glycerol-3-phosphate dehydrogenase, putative                                  | --           | Mitochondrial respiratory chain complex II (ETC)                                             | 26               | 4                                                 | 9 (4,5)                                                              |
| PF3D7_0310400    | Parasite-infected erythrocyte surface protein                                               | PIESP1       | Exported protein, host cell plasma membrane                                                  | 25               | 3                                                 | 5 (2,3)                                                              |
| PF3D7_1464700    | ATP synthase (C/AC39) subunit, putative                                                     | --           | Digestive vacuole, vacuolar proton-transporting V-type ATPase, Ca2+ homeostasis              | 25               | 4                                                 | 7 (3,4)                                                              |
| PF3D7_1362200    | RuvB-like helicase 3                                                                        | RUVB3        | Nucleus / DNA replication and repair                                                         | 25               | 3                                                 | 5 (3,2)                                                              |
| PF3D7_0512600    | Ras-related protein Rab1B                                                                   | RAB1B        | ER-Golgi translocation and quality control                                                   | 25               | 5                                                 | 9 (4,5)                                                              |
| PF3D7_1360900    | Polyadenylate-binding protein, putative                                                     | PABP         | Translation initiation                                                                       | 24               | 5                                                 | 11 (5,6)                                                             |
| PF3D7_1353100    | Plasmodium exported protein, unknown function                                               | --           | Maurer's cleft exported protein                                                              | 23               | 3                                                 | 7 (3,4)                                                              |
| PF3D7_0303000    | N-ethylmaleimide-sensitive fusion protein                                                   | NSF          | Exported vesicle-associated protein                                                          | 21               | 4                                                 | 8 (3,5)                                                              |
| PF3D7_0925900    | Conserved <i>Plasmodium</i> protein, unknown function                                       | --           | No known or predicted function                                                               | 20               | 4                                                 | 8 (4,4)                                                              |
| PF3D7_1135400    | Conserved <i>Plasmodium</i> protein, unknown function                                       | --           | No known or predicted function                                                               | 20               | 2                                                 | 5 (2,3)                                                              |
| PF3D7_1360800    | Falicylsin                                                                                  | FLN          | Digestive vacuole, globin peptide degradation                                                | 20               | 4                                                 | 6 (2,4)                                                              |
| PF3D7_0903200    | Ras-related protein Rab7                                                                    | RAB7         | Intracellular traffic, late endosome, digestive vacuole                                      | 20               | 3                                                 | 5 (3,2)                                                              |
| PF3D7_1212000    | Glutathione peroxidase-like thioredoxin peroxidase                                          | TPx(GI)      | Mitochondrial antioxidant system                                                             | 19               | 3                                                 | 7 (3,4)                                                              |
| PF3D7_1343000    | Phosphoethanolamine N-methyltransferase                                                     | PMT          | Methionine and phosphatidylcholine metabolism                                                | 19               | 4                                                 | 6 (2,4)                                                              |
| PF3D7_0532100    | Early transcribed membrane protein 5                                                        | ETRAPM5      | Parasitophorous vacuole membrane protein                                                     | 19               | 3                                                 | 6 (3,3)                                                              |
| PF3D7_1443900    | Heat shock protein 90, putative                                                             | HSP90        | Chaperone protein, putative apicoplast localization                                          | 19               | 4                                                 | 7 (4,3)                                                              |
| PF3D7_1416100    | Protein SEY1, putative                                                                      | SEY1         | Putative mediator of ER membrane fusion                                                      | 19               | 4                                                 | 8 (4,4)                                                              |
| PF3D7_0532300    | <i>Plasmodium</i> exported protein (PHISTb), unknown function                               | --           | Exported protein                                                                             | 18               | 4                                                 | 6 (2,4)                                                              |
| PF3D7_1431600    | Succinyl-CoA ligase [ADP-forming] subunit beta, putative                                    | --           | Mitochondrial TCA cycle                                                                      | 17               | 5                                                 | 10 (5,5)                                                             |
| PF3D7_1434800    | Mitochondrial acidic protein MAM33, putative                                                | --           | Mitochondrial matrix, putative                                                               | 17               | 6                                                 | 13 (6,7)                                                             |
| PF3D7_1333000    | 20 kDa chaperonin                                                                           | CPN20        | Protein chaperone, apicoplast, potentially mitochondrial protein import                      | 15               | 3                                                 | 6 (3,3)                                                              |
| PF3D7_0719600    | 60S ribosomal protein L11a, putative                                                        | --           | Large ribosomal subunit                                                                      | 15               | 2                                                 | 6 (2,4)                                                              |
| PF3D7_0702400    | Small exported membrane protein 1                                                           | SEMP1        | Maurer's cleft exported protein                                                              | 14               | 3                                                 | 7 (3,4)                                                              |
| PF3D7_0831600    | Cytoadherence linked asexual protein 8                                                      | CLAG8        | Putative rohyptry protein                                                                    | 14               | 4                                                 | 7 (4,3)                                                              |
| PF3D7_1129900    | Major facilitator superfamily-related transporter, putative                                 | MFR5         | Putative plasma membrane-localized amino acid transporter                                    | 12               | 4                                                 | 6 (3,3)                                                              |

S2 Table. Putative K13-interacting protein partners identified by co-immunoprecipitation and LC/MS-MS (relaxed criteria). Page 2 of 2.

| PlasmoDB Gene ID | Gene Name                                                     | Abbreviation | Cellular component and/or functional features                         | Mean fold change | Number of experiments present (of 6) <sup>1</sup> | Number of samples present (of 13 total, 6 WT, 7 mutant) <sup>2</sup> |
|------------------|---------------------------------------------------------------|--------------|-----------------------------------------------------------------------|------------------|---------------------------------------------------|----------------------------------------------------------------------|
| PF3D7_1143400    | Translation initiation factor eIF1A, putative                 | eIF1A        | Translation initiation                                                | 11               | 3                                                 | 7 (3,4)                                                              |
| PF3D7_1242700    | 40S ribosomal protein S17, putative                           | --           | Small ribosomal subunit                                               | 11               | 5                                                 | 11 (5,6)                                                             |
| PF3D7_0807300    | Ras-related protein Rab18                                     | RAB18        | Intracellular traffic, endocytosis                                    | 10               | 4                                                 | 9 (4,5)                                                              |
| PF3D7_1126200    | 40S ribosomal protein S18, putative                           | --           | Small ribosomal subunit                                               | 10               | 4                                                 | 7 (4,3)                                                              |
| PF3D7_1239700    | ATP-dependent zinc metalloprotease FTSH 1                     | FTSH1        | Mitochondrial protein degradation                                     | 9                | 3                                                 | 7 (3,4)                                                              |
| PF3D7_1365900    | Ubiquitin-60S ribosomal protein L40                           | --           | Proteasomal degradation of ubiquitinated proteins                     | 9                | 3                                                 | 7 (3,4)                                                              |
| PF3D7_1219100    | Clathrin heavy chain, putative                                | --           | Clathrin coat of trans-Golgi network vesicle                          | 9                | 3                                                 | 6 (3,3)                                                              |
| PF3D7_1228600    | Merozoite surface protein 9                                   | MSP9         | Merozoite surface protein                                             | 9                | 4                                                 | 8 (4,4)                                                              |
| PF3D7_1419200    | Thioredoxin-like protein, putative                            | --           | Redox metabolism, putative apicoplast localization                    | 8                | 2                                                 | 5 (2,3)                                                              |
| PF3D7_1358800    | 40S ribosomal protein S15                                     | RPS15        | Small ribosomal subunit                                               | 8                | 5                                                 | 8 (5,3)                                                              |
| PF3D7_0709000    | Chloroquine resistance transporter                            | PfCRT        | Digestive vacuole membrane                                            | 8                | 4                                                 | 9 (4,5)                                                              |
| PF3D7_1346100    | Protein transport protein SEC61 subunit alpha                 | SEC61        | ER Sec61 translocon                                                   | 8                | 3                                                 | 7 (3,4)                                                              |
| PF3D7_1441200    | 60S ribosomal protein L1, putative                            | --           | Large ribosomal subunit                                               | 8                | 5                                                 | 9 (5,4)                                                              |
| PF3D7_1105400    | 40S ribosomal protein S4, putative                            | --           | Small ribosomal subunit                                               | 8                | 5                                                 | 11 (5,6)                                                             |
| PF3D7_1342000    | 40S ribosomal protein S6                                      | --           | Small ribosomal subunit                                               | 7                | 5                                                 | 8 (3,5)                                                              |
| PF3D7_1211900    | Cation ATPase ATP4                                            | ATP4         | Sodium-dependent ATPase, plasma membrane                              | 7                | 4                                                 | 8 (4,4)                                                              |
| PF3D7_1227100    | DNA helicase 60                                               | DH60         | Transcription, putative mitochondrial localization                    | 7                | 3                                                 | 6 (2,4)                                                              |
| PF3D7_0517300    | Serine/arginine-rich splicing factor 1                        | SR1          | Regulation of mRNA splicing, RNA steady state levels                  | 6                | 3                                                 | 7 (3,4)                                                              |
| PF3D7_1328300    | Conserved <i>Plasmodium</i> protein, unknown function         | --           | No known or predicted function                                        | 6                | 2                                                 | 5 (2,3)                                                              |
| PF3D7_1036900    | Conserved <i>Plasmodium</i> protein, unknown function         | --           | No known or predicted function                                        | 5                | 3                                                 | 7 (2,5)                                                              |
| PF3D7_1364100    | 6-cysteine protein                                            | P92          | Merozoite surface protein                                             | 5                | 3                                                 | 5 (2,3)                                                              |
| PF3D7_0102200    | Ring-infected erythrocyte surface antigen                     | RESA         | Merozoite dense granules                                              | 4                | 4                                                 | 8 (4,4)                                                              |
| PF3D7_1404900    | Conserved Plasmodium protein, unknown function                | --           | ER retention sequence, proteome of the parasitophorous vacuole        | 4                | 3                                                 | 5 (2,3)                                                              |
| PF3D7_1127000    | Protein phosphatase, putative                                 | --           | Digestive vacuole proteome                                            | 4                | 3                                                 | 6 (3,3)                                                              |
| PF3D7_1344800    | Aspartate carbamoyltransferase                                | ATCase       | Ornithine metabolism                                                  | 4                | 3                                                 | 6 (3,3)                                                              |
| PF3D7_1038000    | Antigen UB05                                                  | --           | Digestive vacuole proteome                                            | 3                | 2                                                 | 5 (2,3)                                                              |
| PF3D7_0601900    | Conserved Plasmodium protein, unknown function                | --           | Maurer's cleft exported protein, upregulated in response to ER stress | 3                | 3                                                 | 6 (3,3)                                                              |
| PF3D7_1306200    | Conserved Plasmodium protein, unknown function                | --           | Protein released from infected cells during rupture                   | 3                | 2                                                 | 5 (2,3)                                                              |
| PF3D7_0731300    | <i>Plasmodium</i> exported protein (PHISTb), unknown function | G174         | Maurer's cleft exported protein                                       | 2                | 4                                                 | 6 (0,6)                                                              |

<sup>1</sup>A summary of these experiments can be found in S2 Table.<sup>2</sup>The 13 samples were derived from Cam3.II<sup>WT</sup> (4), Cam3.II<sup>R539T</sup> (4), Cam3.II<sup>C580Y</sup> (2), CamWT<sup>WT</sup> (2), and CamWT<sup>C580Y</sup> (1).
