# Supplementary material for: Insights into the intracellular localization, protein associations and artemisinin resistance properties of Plasmodium falciparum K13
Source: PubMed Central journal article supplement (PMC7192513; doi:10.1371/journal.ppat.1008482), 2020-04-20
Supplement: ppat.1008482.s010.pdf [file ppat.1008482.s010.pdf]

S3 Table. PANTHER overrepresentation test for biological processes.

| PANTHER Biological Process (GO Category) <sup>1</sup>               | Total <i>P. falciparum</i> proteins per category | Total proteins in K13 IP list <sup>2</sup> | Expected number of proteins in K13 IP list <sup>3</sup> | Fold enrichment <sup>4</sup> | p value <sup>5</sup> | False discovery rate |
|---------------------------------------------------------------------|--------------------------------------------------|--------------------------------------------|---------------------------------------------------------|------------------------------|----------------------|----------------------|
| Ras protein signal transduction (GO:0007265)                        | 13                                               | 7                                          | 0.40                                                    | 18                           | 9.8E-07              | 3.2E-04              |
| Small GTPase mediated signal transduction (GO:0007264)              | 13                                               | 7                                          | 0.40                                                    | 18                           | 9.8E-07              | 2.4E-04              |
| Tricarboxylic acid cycle (GO:0006099)                               | 9                                                | 4                                          | 0.27                                                    | 15                           | 4.3E-04              | 2.1E-02              |
| Generation of precursor metabolites and energy (GO:0006091)         | 9                                                | 4                                          | 0.27                                                    | 15                           | 4.3E-04              | 2.0E-02              |
| Nucleoside triphosphate biosynthetic process (GO:0009142)           | 11                                               | 4                                          | 0.34                                                    | 12                           | 7.8E-04              | 3.2E-02              |
| Nucleotide phosphorylation (GO:0046939)                             | 14                                               | 5                                          | 0.43                                                    | 12                           | 1.8E-04              | 1.9E-02              |
| Phosphorylation (GO:0016310)                                        | 14                                               | 5                                          | 0.43                                                    | 12                           | 1.8E-04              | 1.7E-02              |
| Aerobic respiration (GO:0009060)                                    | 12                                               | 4                                          | 0.37                                                    | 11                           | 1.0E-03              | 4.0E-02              |
| Pyruvate metabolic process (GO:0006090)                             | 12                                               | 4                                          | 0.37                                                    | 11                           | 1.0E-03              | 3.8E-02              |
| Nucleotide catabolic process (GO:0009166)                           | 12                                               | 4                                          | 0.37                                                    | 11                           | 1.0E-03              | 3.7E-02              |
| Carboxylic acid metabolic process (GO:0019752)                      | 16                                               | 5                                          | 0.49                                                    | 10                           | 3.0E-04              | 2.1E-02              |
| Coenzyme metabolic process (GO:0006732)                             | 17                                               | 5                                          | 0.52                                                    | 9.6                          | 3.8E-04              | 2.1E-02              |
| Organic acid metabolic process (GO:0006082)                         | 17                                               | 5                                          | 0.52                                                    | 9.6                          | 3.8E-04              | 2.0E-02              |
| Oxoacid metabolic process (GO:0043436)                              | 17                                               | 5                                          | 0.52                                                    | 9.6                          | 3.8E-04              | 1.9E-02              |
| Nucleoside triphosphate metabolic process (GO:0009141)              | 14                                               | 4                                          | 0.43                                                    | 9.4                          | 1.6E-03              | 4.6E-02              |
| Cellular respiration (GO:0045333)                                   | 24                                               | 6                                          | 0.73                                                    | 8.2                          | 2.0E-04              | 1.8E-02              |
| Energy derivation by oxidation of organic compounds (GO:0015980)    | 24                                               | 6                                          | 0.73                                                    | 8.2                          | 2.0E-04              | 1.6E-02              |
| Phosphate-containing compound metabolic process (GO:0006796)        | 26                                               | 6                                          | 0.79                                                    | 7.6                          | 2.9E-04              | 2.2E-02              |
| Oxidation-reduction process (GO:0005114)                            | 27                                               | 6                                          | 0.82                                                    | 7.3                          | 3.5E-04              | 2.3E-02              |
| Carbohydrate metabolic process (GO:0005975)                         | 27                                               | 6                                          | 0.82                                                    | 7.3                          | 3.5E-04              | 2.1E-02              |
| Coenzyme biosynthetic process (GO:0009108)                          | 24                                               | 5                                          | 0.73                                                    | 6.8                          | 1.4E-03              | 4.2E-02              |
| Response to chemical (GO:0042221)                                   | 25                                               | 5                                          | 0.76                                                    | 6.6                          | 1.7E-03              | 4.5E-02              |
| Phosphorus metabolic process (GO:0006793)                           | 31                                               | 6                                          | 1.0                                                     | 6.3                          | 6.7E-04              | 2.8E-02              |
| Cofactor metabolic process (GO:0051186)                             | 59                                               | 11                                         | 1.8                                                     | 6.1                          | 5.2E-06              | 1.0E-03              |
| Response to stimulus (GO:0050896)                                   | 49                                               | 9                                          | 1.5                                                     | 6.0                          | 4.3E-05              | 5.2E-03              |
| Nucleobase-containing small molecule metabolic process (GO:0055086) | 50                                               | 7                                          | 1.5                                                     | 4.6                          | 1.3E-03              | 4.1E-02              |
| Small molecule metabolic process (GO:0044281)                       | 58                                               | 8                                          | 1.8                                                     | 4.5                          | 6.6E-04              | 2.9E-02              |
| Cellular localization (GO:0051641)                                  | 195                                              | 15                                         | 6.0                                                     | 2.5                          | 1.3E-03              | 4.0E-02              |
| Cellular metabolic process (GO:0044237)                             | 339                                              | 26                                         | 10                                                      | 2.5                          | 3.3E-05              | 4.5E-03              |
| Biological regulation (GO:0065007)                                  | 215                                              | 16                                         | 6.6                                                     | 2.4                          | 1.2E-03              | 4.1E-02              |
| Cellular component organization (GO:0016043)                        | 247                                              | 18                                         | 7.5                                                     | 2.4                          | 1.1E-03              | 3.7E-02              |
| Cellular process (GO:0009987)                                       | 833                                              | 57                                         | 25                                                      | 2.2                          | 3.6E-09              | 1.7E-06              |
| Localization (GO:0051179)                                           | 346                                              | 22                                         | 11                                                      | 2.1                          | 1.3E-03              | 4.1E-02              |
| Metabolic process (GO:0008152)                                      | 904                                              | 50                                         | 28                                                      | 1.8                          | 2.2E-05              | 3.5E-03              |
| Organic substance metabolic process (GO:0071704)                    | 773                                              | 39                                         | 24                                                      | 1.7                          | 1.6E-03              | 4.6E-02              |

<sup>1</sup>Refers to GO-Slim Biology Process database from PANTHER version 14.1 (<http://pantherdb.org>). Released 2019-03-12.

<sup>2</sup>Immunoprecipitated proteins are listed in Table 1 or S3 Table. Of the 173 listed in those tables, 166 were assigned to GO categories by PANTHER.

<sup>3</sup>This calculation was based on the PANTHER estimation of 5,500 *P. falciparum* proteins. This is similar to the lower estimate of 4,800 proteins in the Malaria Parasite Metabolic Pathways database (<http://mpmp.huji.ac.il>).

<sup>4</sup>Enrichment was calculated as the number of proteins identified in the K13 IP list divided by the number expected if the IP output were random.

<sup>5</sup>Overrepresentation was determined by Fisher's exact tests with false discovery rate controls.

GO, gene ontology; IP, immunoprecipitation.
