# Supplementary material for: Insights into the intracellular localization, protein associations and artemisinin resistance properties of Plasmodium falciparum K13
Source: PubMed Central journal article supplement (PMC7192513; doi:10.1371/journal.ppat.1008482), 2020-04-20
Supplement: ppat.1008482.s011.pdf [file ppat.1008482.s011.pdf]

**S4 Table. PANTHER overrepresentation test for cellular components.**

| PANTHER Cellular Component (GO Category) <sup>1</sup> | Total <i>P. falciparum</i> proteins per category | Total proteins in K13 IP list <sup>2</sup> | Expected number of proteins in K13 IP list <sup>3</sup> | Fold enrichment <sup>4</sup> | <i>p</i> value <sup>5</sup> | False discovery rate |
|-------------------------------------------------------|--------------------------------------------------|--------------------------------------------|---------------------------------------------------------|------------------------------|-----------------------------|----------------------|
| Oxidoreductase complex (GO:1990204)                   | 5                                                | 4                                          | 0.15                                                    | 26                           | 8.3E-05                     | 2.1E-03              |
| Apical part of cell (GO:0045177)                      | 5                                                | 3                                          | 0.15                                                    | 20                           | 1.3E-03                     | 2.6E-02              |
| Mitochondrial protein complex (GO:0098798)            | 9                                                | 4                                          | 0.27                                                    | 15                           | 4.3E-04                     | 1.0E-02              |
| Cytosolic small ribosomal subunit (GO:0022627)        | 35                                               | 10                                         | 1.1                                                     | 9.4                          | 5.1E-07                     | 1.6E-05              |
| Cytosolic ribosome (GO:0022626)                       | 82                                               | 14                                         | 2.5                                                     | 5.6                          | 6.7E-07                     | 1.9E-05              |
| Cytosolic part (GO:0044445)                           | 98                                               | 16                                         | 3.0                                                     | 5.4                          | 1.8E-07                     | 6.0E-06              |
| Cytosol (GO:0005829)                                  | 250                                              | 34                                         | 7.6                                                     | 4.5                          | 9.2E-13                     | 3.6E-11              |
| Mitochondrion (GO:0005739)                            | 77                                               | 9                                          | 2.4                                                     | 3.8                          | 9.2E-04                     | 2.0E-02              |
| Cytoplasmic part (GO:0044444)                         | 579                                              | 56                                         | 18                                                      | 3.2                          | 5.7E-15                     | 2.9E-13              |
| Cell (GO:0005623)                                     | 1008                                             | 87                                         | 31                                                      | 2.8                          | 7.3E-22                     | 2.2E-19              |
| Cell part (GO:0044464)                                | 1004                                             | 86                                         | 31                                                      | 2.8                          | 2.5E-21                     | 3.9E-19              |
| Intracellular (GO:0005622)                            | 940                                              | 79                                         | 29                                                      | 2.8                          | 1.2E-18                     | 1.2E-16              |
| Cytoplasm (GO:0005737)                                | 859                                              | 72                                         | 26                                                      | 2.8                          | 1.4E-16                     | 8.3E-15              |
| Intracellular part (GO:0044424)                       | 905                                              | 75                                         | 28                                                      | 2.7                          | 3.7E-17                     | 2.8E-15              |

<sup>1</sup>Refers to GO-Slim Cellular Component database from PANTHER version 14.1 (<http://pantherdb.org>). Released 2019-03-12.

<sup>2</sup>Immunoprecipitated proteins are listed in Table 1 or S3 Table. Of the 173 listed in those tables, 166 were assigned to GO categories by PANTHER.

<sup>3</sup>This calculation was based on the PANTHER estimation of 5,500 *P. falciparum* proteins. This is similar to the lower estimate of 4,800 proteins in the Malaria Parasite Metabolic Pathways database (<http://mpmp.huji.ac.il>).

<sup>4</sup>Enrichment was calculated as the number of proteins identified in the K13 IP list divided by the number expected if the IP output were random.

<sup>5</sup>Overrepresentation was determined by Fisher's exact tests with false discovery rate controls.

GO, gene ontology; IP, immunoprecipitation.
