# Supplementary material for: Insights into the intracellular localization, protein associations and artemisinin resistance properties of Plasmodium falciparum K13
Source: PubMed Central journal article supplement (PMC7192513; doi:10.1371/journal.ppat.1008482), 2020-04-20
Supplement: ppat.1008482.s012.pdf [file ppat.1008482.s012.pdf]

S5 Table. Pearson correlation coefficient values for IFA studies.

| Parasite line <sup>1</sup>    | Antibodies used for staining          | Treatment <sup>2</sup> | 0h post treatment |                  | 3h post treatment |                  | 12h post treatment |                  | 24h post treatment |                  | 1h post treatment      |    |                  |
|-------------------------------|---------------------------------------|------------------------|-------------------|------------------|-------------------|------------------|--------------------|------------------|--------------------|------------------|------------------------|----|------------------|
|                               |                                       |                        | N <sup>3</sup>    | PCC median [IQR] | N                 | PCC median [IQR] | N                  | PCC median [IQR] | N                  | PCC median [IQR] | Treatment <sup>4</sup> | N  | PCC median [IQR] |
| Cam3.II <sup>R539T</sup>      | $\alpha$ -K13 (E3) / $\alpha$ -Rab5A  | DMSO                   | 20                | 0.47 [0.38-0.67] | --                | --               | 20                 | 0.37 [0.21-0.52] | --                 | --               | EtOH                   | -- | --               |
|                               |                                       | DHA (700 nM)           | 21                | 0.44 [0.33-0.58] | --                | --               | 22                 | 0.43 [0.28-0.65] | --                 | --               | BFA (5 $\mu$ g/ml)     | -- | --               |
| Cam3.II <sup>WT</sup>         | $\alpha$ -K13 (E3) / $\alpha$ -Rab5A  | DMSO                   | 23                | 0.47 [0.39-0.57] | --                | --               | 23                 | 0.53 [0.46-0.61] | --                 | --               | EtOH                   | -- | --               |
|                               |                                       | DHA (700 nM)           | 21                | 0.50 [0.37-0.58] | --                | --               | 37                 | 0.65 [0.53-0.71] | --                 | --               | BFA (5 $\mu$ g/ml)     | -- | --               |
| Cam3.II <sup>R539T</sup>      | $\alpha$ -K13 (E3) / $\alpha$ -Rab5B  | DMSO                   | 16                | 0.34 [0.30-0.57] | --                | --               | --                 | --               | --                 | --               | EtOH                   | -- | --               |
|                               |                                       | DHA (700 nM)           | 14                | 0.34 [0.20-0.42] | --                | --               | --                 | --               | --                 | --               | BFA (5 $\mu$ g/ml)     | -- | --               |
| Cam3.II <sup>WT</sup>         | $\alpha$ -K13 (E3) / $\alpha$ -Rab5B  | DMSO                   | 21                | 0.41 [0.30-0.49] | --                | --               | --                 | --               | --                 | --               | EtOH                   | -- | --               |
|                               |                                       | DHA (700 nM)           | 17                | 0.43 [0.27-0.55] | --                | --               | --                 | --               | --                 | --               | BFA (5 $\mu$ g/ml)     | -- | --               |
| Cam3.II <sup>R539T</sup>      | $\alpha$ -K13 (E3) / $\alpha$ -Rab5C  | DMSO                   | 11                | 0.33 [0.25-0.43] | --                | --               | --                 | --               | --                 | --               | EtOH                   | -- | --               |
|                               |                                       | DHA (700 nM)           | 11                | 0.27 [0.19-0.47] | --                | --               | --                 | --               | --                 | --               | BFA (5 $\mu$ g/ml)     | -- | --               |
| Cam3.II <sup>WT</sup>         | $\alpha$ -K13 (E3) / $\alpha$ -Rab5C  | DMSO                   | 14                | 0.41 [0.34-0.57] | --                | --               | --                 | --               | --                 | --               | EtOH                   | -- | --               |
|                               |                                       | DHA (700 nM)           | 15                | 0.48 [0.37-0.57] | --                | --               | --                 | --               | --                 | --               | BFA (5 $\mu$ g/ml)     | -- | --               |
| Cam3.II <sup>R539T</sup>      | $\alpha$ -K13 (E3) / $\alpha$ -Rab7   | DMSO                   | 11                | 0.67 [0.56-0.74] | --                | --               | --                 | --               | --                 | --               | EtOH                   | -- | --               |
|                               |                                       | DHA (700 nM)           | 13                | 0.59 [0.49-0.70] | --                | --               | --                 | --               | --                 | --               | BFA (5 $\mu$ g/ml)     | -- | --               |
| Cam3.II <sup>WT</sup>         | $\alpha$ -K13 (E3) / $\alpha$ -Rab7   | DMSO                   | 13                | 0.68 [0.58-0.73] | --                | --               | --                 | --               | --                 | --               | EtOH                   | -- | --               |
|                               |                                       | DHA (700 nM)           | 13                | 0.68 [0.56-0.75] | --                | --               | --                 | --               | --                 | --               | BFA (5 $\mu$ g/ml)     | -- | --               |
| Dd2 <sup>R539T</sup> Rab6-GFP | $\alpha$ -K13 (E3) / $\alpha$ -GFP    | DMSO                   | 21                | 0.52 [0.46-0.58] | --                | --               | --                 | --               | --                 | --               | EtOH                   | -- | --               |
|                               |                                       | DHA (700 nM)           | 28                | 0.64 [0.57-0.76] | --                | --               | --                 | --               | --                 | --               | BFA (5 $\mu$ g/ml)     | -- | --               |
| Dd2 <sup>WT</sup> Rab6-GFP    | $\alpha$ -K13 (E3) / $\alpha$ -GFP    | DMSO                   | 11                | 0.53 [0.37-0.64] | --                | --               | --                 | --               | --                 | --               | EtOH                   | -- | --               |
|                               |                                       | DHA (700 nM)           | 10                | 0.73 [0.61-0.83] | --                | --               | --                 | --               | --                 | --               | BFA (5 $\mu$ g/ml)     | -- | --               |
| Cam3.II <sup>R539T</sup>      | $\alpha$ -K13 (E3) / $\alpha$ -Rab11A | DMSO                   | 18                | 0.83 [0.60-0.95] | --                | --               | 12                 | 0.72 [0.56-0.78] | --                 | --               | EtOH                   | -- | --               |
|                               |                                       | DHA (700 nM)           | 13                | 0.84 [0.76-0.92] | --                | --               | 18                 | 0.70 [0.63-0.85] | --                 | --               | BFA (5 $\mu$ g/ml)     | -- | --               |
| Cam3.II <sup>WT</sup>         | $\alpha$ -K13 (E3) / $\alpha$ -Rab11A | DMSO                   | 14                | 0.60 [0.44-0.74] | --                | --               | 17                 | 0.61 [0.51-0.66] | --                 | --               | EtOH                   | -- | --               |
|                               |                                       | DHA (700 nM)           | 15                | 0.86 [0.75-0.91] | --                | --               | 14                 | 0.64 [0.55-0.70] | --                 | --               | BFA (5 $\mu$ g/ml)     | -- | --               |
| Dd2 <sup>WT</sup> Sec24A-GFP  | $\alpha$ -K13 (E3) / $\alpha$ -GFP    | DMSO                   | 11                | 0.67 [0.42-0.72] | --                | --               | --                 | --               | --                 | --               | EtOH                   | -- | --               |
|                               |                                       | DHA (700 nM)           | 12                | 0.60 [0.49-0.68] | --                | --               | --                 | --               | --                 | --               | BFA (5 $\mu$ g/ml)     | -- | --               |
| Cam3.II <sup>R539T</sup>      | $\alpha$ -K13 (E3) / $\alpha$ -BiP    | DMSO                   | 19                | 0.72 [0.55-0.85] | 8                 | 0.59 [0.51-0.80] | 11                 | 0.78 [0.71-0.93] | 10                 | 0.47 [0.28-0.54] | EtOH                   | 20 | 0.64 [0.55-0.67] |
|                               |                                       | DHA (700 nM)           | 15                | 0.65 [0.49-0.69] | 9                 | 0.60 [0.52-0.66] | 10                 | 0.82 [0.76-0.89] | 11                 | 0.75 [0.57-0.76] | BFA (5 $\mu$ g/ml)     | 23 | 0.85 [0.68-0.92] |
| Cam3.II <sup>WT</sup>         | $\alpha$ -K13 (E3) / $\alpha$ -BiP    | DMSO                   | 20                | 0.64 [0.48-0.74] | 9                 | 0.61 [0.48-0.65] | 11                 | 0.77 [0.65-0.80] | 9                  | 0.35 [0.13-0.43] | EtOH                   | 17 | 0.68 [0.54-0.73] |
|                               |                                       | DHA (700 nM)           | 19                | 0.62 [0.49-0.70] | 10                | 0.65 [0.55-0.75] | 10                 | 0.58 [0.41-0.73] | 13                 | 0.45 [0.33-0.52] | BFA (5 $\mu$ g/ml)     | 17 | 0.56 [0.29-0.70] |
| Cam3.II <sup>R539T</sup>      | $\alpha$ -K13 (E3) / $\alpha$ -ERD2   | DMSO                   | 9                 | 0.39 [0.29-0.52] | --                | --               | --                 | --               | --                 | --               | EtOH                   | 20 | 0.42 [0.31-0.57] |
|                               |                                       | DHA (700 nM)           | 10                | 0.40 [0.21-0.53] | --                | --               | --                 | --               | --                 | --               | BFA (5 $\mu$ g/ml)     | 23 | 0.47 [0.33-0.58] |
| Cam3.II <sup>WT</sup>         | $\alpha$ -K13 (E3) / $\alpha$ -ERD2   | DMSO                   | 9                 | 0.44 [0.31-0.57] | --                | --               | --                 | --               | --                 | --               | EtOH                   | 26 | 0.39 [0.29-0.52] |
|                               |                                       | DHA (700 nM)           | 9                 | 0.41 [0.24-0.43] | --                | --               | --                 | --               | --                 | --               | BFA (5 $\mu$ g/ml)     | 23 | 0.40 [0.35-0.55] |
| Cam3.II <sup>R539T</sup>      | $\alpha$ -K13 (E3) / $\alpha$ -TRIC   | DMSO                   | 22                | 0.62 [0.50-0.69] | --                | --               | --                 | --               | --                 | --               | EtOH                   | -- | --               |
|                               |                                       | DHA (700 nM)           | 19                | 0.63 [0.50-0.75] | --                | --               | --                 | --               | --                 | --               | BFA (5 $\mu$ g/ml)     | -- | --               |
| Cam3.II <sup>WT</sup>         | $\alpha$ -K13 (E3) / $\alpha$ -TRIC   | DMSO                   | 23                | 0.61 [0.51-0.71] | --                | --               | --                 | --               | --                 | --               | EtOH                   | -- | --               |
|                               |                                       | DHA (700 nM)           | 21                | 0.68 [0.53-0.77] | --                | --               | --                 | --               | --                 | --               | BFA (5 $\mu$ g/ml)     | -- | --               |

<sup>1</sup>Cam3.II<sup>WT</sup> was previously referred to as Cam3.II<sup>EV</sup> (clone C2; Straimer *et al.*, 2015; PMID 25502314).

<sup>2</sup>Very early ring-stage parasites (0-3 hpi) were exposed to 700 nM DHA or DMSO vehicle control for 6h, after which compound was removed by washout.

<sup>3</sup>N, number of individual parasites used for quantitative imaging-based analyses. Individual parasites were analyzed from one to two independent experiments.

<sup>4</sup>Very early ring-stage parasites (0-3 hpi) were exposed to BFA at 5  $\mu$ g/ml or EtOH vehicle control for 6h, after which compound was removed by washout.

BFA, Brefeldin A; DHA, dihydroartemisinin; DMSO, dimethyl sulfoxide; EtOH, ethanol; IQR, interquartile range; PCC, Pearson correlation coefficient.
