# Supplementary material for: Insights into the intracellular localization, protein associations and artemisinin resistance properties of Plasmodium falciparum K13
Source: PubMed Central journal article supplement (PMC7192513; doi:10.1371/journal.ppat.1008482), 2020-04-20
Supplement: ppat.1008482.s013.pdf [file ppat.1008482.s013.pdf]

**S6 Table. Pearson correlation coefficient values for MitoTracker Deep Red imaging studies.**

| Parasite line                                    | Antibody/Dye used for staining            | Treatment <sup>1</sup>  | Duration of Treatment | 0h post treatment |                    | 12h post treatment |                    |
|--------------------------------------------------|-------------------------------------------|-------------------------|-----------------------|-------------------|--------------------|--------------------|--------------------|
|                                                  |                                           |                         |                       | N <sup>2</sup>    | PCC median [IQR]   | N                  | PCC median [IQR]   |
| NF54 <sup>WT</sup> attB-GFP-K13 <sup>WT</sup>    | $\alpha$ -GFP / MitoTracker Deep Red      | DMSO                    | 6h                    | 31                | 0.25 [0.10-0.41]   | 18                 | 0.44 [0.16-0.60]   |
|                                                  |                                           | DHA (700 nM)            | 6h                    | 33                | 0.55 [0.33-0.76]   | 20                 | 0.84 [0.74-0.92]   |
| NF54 <sup>WT</sup> attB-3HA-K13 <sup>C580Y</sup> | $\alpha$ -HA / MitoTracker Deep Red       | DMSO                    | 6h                    | 16                | 0.34 [0.22-0.53]   | --                 | --                 |
|                                                  |                                           | DHA (700 nM)            | 6h                    | 19                | 0.56 [0.42-0.61]   | --                 | --                 |
| Cam3.II <sup>R539T</sup>                         | $\alpha$ -K13 (E3) / MitoTracker Deep Red | DMSO                    | 6h                    | 20                | -0.03 [-0.11-0.13] | 19                 | 0.031 [-0.04-0.10] |
|                                                  |                                           | DHA (700 nM)            | 6h                    | 23                | 0.22 [0.09-0.40]   | 20                 | 0.37 [0.14-0.52]   |
| Cam3.II <sup>WT</sup>                            | $\alpha$ -K13 (E3) / MitoTracker Deep Red | DMSO                    | 6h                    | 18                | 0.11 [0.02-0.24]   | 21                 | 0.21 [0.17-0.33]   |
|                                                  |                                           | DHA (700 nM)            | 6h                    | 22                | 0.24 [0.07-0.39]   | 22                 | 0.42 [0.36-0.53]   |
| Cam3.II <sup>R539T</sup>                         | $\alpha$ -K13 (E3) / MitoTracker Deep Red | DMSO                    | 4h                    | 11                | 0.10 [-0.05-0.17]  | --                 | --                 |
|                                                  |                                           | DHA (60 nM)             | 4h                    | 10                | 0.05 [-0.15-0.13]  | --                 | --                 |
|                                                  |                                           | ATQ (100 nM)            | 4h                    | 13                | 0.06 [-0.04-0.20]  | --                 | --                 |
|                                                  |                                           | ATQ (1200 nM)           | 4h                    | 12                | 0.03 [-0.06-0.17]  | --                 | --                 |
|                                                  |                                           | DHA 60 nM + ATQ 100 nM  | 4h                    | 13                | 0.33 [0.14-0.41]   | --                 | --                 |
|                                                  |                                           | DHA 60 nM + ATQ 1200 nM | 4h                    | 12                | 0.30 [0.12-0.57]   | --                 | --                 |
| Cam3.II <sup>WT</sup>                            | $\alpha$ -K13 (E3) / MitoTracker Deep Red | DMSO                    | 4h                    | 11                | 0.25 [-0.01-0.35]  | --                 | --                 |
|                                                  |                                           | DHA (60 nM)             | 4h                    | 10                | 0.08 [0.00-0.37]   | --                 | --                 |
|                                                  |                                           | ATQ (100 nM)            | 4h                    | 12                | 0.28 [0.06-0.35]   | --                 | --                 |
|                                                  |                                           | ATQ (1200 nM)           | 4h                    | 12                | 0.27 [0.09-0.31]   | --                 | --                 |
|                                                  |                                           | DHA 60 nM + ATQ 100 nM  | 4h                    | 12                | 0.10 [0.02-0.23]   | --                 | --                 |
|                                                  |                                           | DHA 60 nM + ATQ 1200 nM | 4h                    | 9                 | 0.38 [0.23-0.41]   | --                 | --                 |
| Cam3.II <sup>R539T</sup>                         | $\alpha$ -ERD2 / MitoTracker Deep Red     | DMSO                    | 6h                    | 13                | 0.38 [0.18-0.68]   | --                 | --                 |
|                                                  |                                           | DHA (700 nM)            | 6h                    | 12                | 0.43 [0.27-0.52]   | --                 | --                 |
| Cam3.II <sup>WT</sup>                            | $\alpha$ -ERD2 / MitoTracker Deep Red     | DMSO                    | 6h                    | 15                | 0.51 [0.25-0.67]   | --                 | --                 |
|                                                  |                                           | DHA (700 nM)            | 6h                    | 13                | 0.56 [0.33-0.71]   | --                 | --                 |
| Cam3.II <sup>R539T</sup>                         | $\alpha$ -TRiC / MitoTracker Deep Red     | DMSO                    | 6h                    | 13                | 0.44 [0.32-0.62]   | --                 | --                 |
|                                                  |                                           | DHA (700 nM)            | 6h                    | 14                | 0.38 [0.26-0.56]   | --                 | --                 |
| Cam3.II <sup>WT</sup>                            | $\alpha$ -TRiC / MitoTracker Deep Red     | DMSO                    | 6h                    | 13                | 0.55 [0.30-0.68]   | --                 | --                 |
|                                                  |                                           | DHA (700 nM)            | 6h                    | 16                | 0.51 [0.25-0.67]   | --                 | --                 |
| Cam3.II <sup>R539T</sup>                         | Rab5A / MitoTracker Deep Red              | DMSO                    | 6h                    | 12                | 0.46 [0.19-0.57]   | --                 | --                 |
|                                                  |                                           | DHA (700 nM)            | 6h                    | 13                | 0.35 [0.30-0.55]   | --                 | --                 |
| Cam3.II <sup>WT</sup>                            | Rab5A / MitoTracker Deep Red              | DMSO                    | 6h                    | 12                | 0.37 [0.23-0.45]   | --                 | --                 |
|                                                  |                                           | DHA (700 nM)            | 6h                    | 14                | 0.44 [0.21-0.56]   | --                 | --                 |
| Cam3.II <sup>R539T</sup>                         | Rab11A / MitoTracker Deep Red             | DMSO                    | 6h                    | 14                | 0.29 [0.17-0.70]   | --                 | --                 |
|                                                  |                                           | DHA (700 nM)            | 6h                    | 15                | 0.45 [0.18-0.71]   | --                 | --                 |
| Cam3.II <sup>WT</sup>                            | Rab11A / MitoTracker Deep Red             | DMSO                    | 6h                    | 13                | 0.10 [0.00-0.57]   | --                 | --                 |
|                                                  |                                           | DHA (700 nM)            | 6h                    | 11                | 0.35 [0.06-0.43]   | --                 | --                 |

<sup>1</sup>Very early ring-stage parasites (0-3 hpi) were pulsed with indicated compound(s) for 4 or 6h, after which compound(s) was/were removed by washout.

<sup>2</sup>N, number of individual parasites used for analyses. Individual parasites were analyzed from one to two independent experiments.

ATQ, atovaquone; DHA, dihydroartemisinin; DMSO, dimethyl sulfoxide; IQR, interquartile range; PCC, Pearson correlation coefficient.
