# Supplementary material for: Insights into the intracellular localization, protein associations and artemisinin resistance properties of Plasmodium falciparum K13
Source: PubMed Central journal article supplement (PMC7192513; doi:10.1371/journal.ppat.1008482), 2020-04-20
Supplement: ppat.1008482.s014.pdf [file ppat.1008482.s014.pdf]

**S7 Table. Oligonucleotides used in this study.**

| <b>Name<sup>1</sup></b> | <b>Nucleotide sequence (5'-3')</b>           | <b>Description</b>                | <b>Lab name</b> |
|-------------------------|----------------------------------------------|-----------------------------------|-----------------|
| --                      | AGATCTATGGAAGGAGAAAAAGTAAAAACAAAAGC          | <i>K13</i> fwd                    | p3947           |
| --                      | CTCGAGTTATATATTTGCTATTAACCGGAGTGACC          | <i>K13</i> rev                    | p3948           |
| --                      | CTGGGCCCATACCATGTTGAATTGGTGACAGG             | <i>K13</i> 5'UTR fwd              | p4376           |
| --                      | CCTAGGAATTATAATTTAATTAACAAAAACATAATAAATGAATG | <i>K13</i> 5'UTR rev              | p4377           |
| --                      | CTCAGATCTGGTGAATGGATGAATTTCAAAGTAAGC         | <i>Rab6</i> fwd                   | poML214         |
| --                      | CCCTCGAGTTAACATAAACATTTACTTAACATATTTTTGTC    | <i>Rab6</i> rev                   | poML204         |
| --                      | CCGGGCCCTCATGCCCTAATAAAAAGTTGCC              | <i>Sec12</i> 5'UTR fwd            | p1144           |
| --                      | CGCCTAGGTTTGTCTTTTTATAATAACA                 | <i>Sec12</i> 5'UTR rev            | p1263           |
| p1                      | CCATGTTGAATTGGTGACAGG                        | <i>K13</i> 5'UTR fwd              | p7370           |
| p2                      | CTAAGAATATTCTTCCTTGTTTATCTCTGG               | <i>K13</i> rev                    | p6456           |
| p3                      | GATGCAAATATTGCTACTGAAACTATGATTG              | <i>K13</i> fwd                    | p6457           |
| p4                      | ATTACCGATATCTGATGTATCATAGGTTAAAGCGTCA        | <i>K13</i> 3'UTR rev              | p6709           |
| p5                      | GAGTTTGTAACAGCTGCTGGG                        | <i>GFP</i> fwd                    | p7363           |
| p6                      | CGACTAGTTAATAAAGGGCAC                        | <i>EF1<math>\alpha</math></i> fwd | p6455           |
| p7                      | GTATATTGGGGTGATGATAAAATGAAAG                 | <i>hsp86</i> 3'UTR rev            | p6458           |
| p8                      | GAAAATATTATTACAAAGGGTGAGG                    | <i>cg6</i> fwd                    | p4092           |
| p9                      | TTAGCTAATTCGCTTGTAAGA                        | <i>bsd</i> rev                    | p4093           |
| p10                     | CGGTACAGCTTGCTGTAAGCGG                       | pDC2 backbone fwd                 | p5863           |
| p11                     | CTCTTCTACTCTTTCGAATTC                        | <i>cg6</i> rev                    | p4094           |

<sup>1</sup>Primer name refers to numbered primers depicted in S1 Fig.

fwd, forward; rev, reverse; UTR, untranslated region.
